# Supplementary material for: A new phosphonate pendant-armed cross-bridged tetraaminechelator accelerates copper(ii) binding for radiopharmaceutical applications
Source: Royal Society of Chemistry journal article supplement (doi:10.1039/b920871b), 2009-12-15
Supplement: b920871b.pdf [file b920871b.pdf]

## [Electronic Supplementary Information (ESI)]

Supplementary Information for:

### **“A new phosphonate pendant-armed cross-bridged tetraamine chelator accelerates copper(II) binding for radiopharmaceutical applications”**

Dannon J. Stigers,<sup>a</sup> Riccardo Ferdani,<sup>b</sup> Gary R. Weisman,<sup>\*a</sup> Edward H. Wong,<sup>\*a</sup> Carolyn J. Anderson,<sup>\*b</sup> James A. Golen,<sup>c</sup> Curtis Moore,<sup>d</sup> and Arnold L. Rheingold<sup>d</sup>

<sup>a</sup> Department of Chemistry, University of New Hampshire, Durham, New Hampshire, 03824, USA. E-mail: ehw@cisunix.unh.edu, gary.weismanunh.edu

<sup>b</sup> Mallinckrodt Institute of Radiology, Washington University School of Medicine, St. Louis, Missouri, 63110, USA. E-mail: andersoncj@wustl.edu

<sup>c</sup> Department of Chemistry and Biochemistry, University of California, San Diego, La Jolla, California, 92093, USA

<sup>d</sup> Department of Chemistry and Biochemistry, University of Massachusetts, Dartmouth, North Dartmouth, Massachusetts, 02747, USA

#### Materials and physical methods:

Reagents: Cupric chloride dihydrate was obtained from Aldrich Chemical Company. Paraformaldehyde and triethyl phosphite were obtained from Acros Organics. 1,1,1,3,3,3-hexafluoro-2-propanol was purchased from Alfa Aesar. Trace Metal™ Grade Hydrochloric Acid was obtained from Fischer Scientific. Amberlite CG50 was obtained from Sigma.

Solvents: Methanol (MeOH, ACS grade) was obtained from Pharmco Products Inc. Diethyl ether (Et<sub>2</sub>O) and toluene (PhCH<sub>3</sub>, ACS grade) were obtained from EMD Chemicals Inc. The solvents were stored in an Innovative Technology Inc. Pure-Solv Solvent Purification System. Prior to use, each solvent was passed through the system's alumina column under low pressure to remove trace impurities.

Melting points (mp) were obtained on a Thomas Hoover capillary melting point apparatus and were uncorrected. Elemental analyses were obtained at Atlantic Microlab Inc., Norcross, GA and Schwartzkopf Microanalytical Laboratory, Woodside, NY. Infrared (IR) spectra were run on a Nicolet MX-1 FT-IR spectrometer and absorptions are reported in wavenumbers (cm<sup>-1</sup>). High-resolution mass spectra were obtained at the Mass Spectrometry

Facility at the University of Notre Dame on a JEOL AX505HA high-resolution mass spectrometer.  $^1\text{H}$  NMR,  $^{13}\text{C}\{^1\text{H}\}$  NMR, and  $^{31}\text{P}\{^1\text{H}\}$  NMR spectra were acquired on a Varian INOVA-500 NMR spectrometer.  $^1\text{H}$  and  $^{13}\text{C}$  chemical shifts are reported in parts per million (ppm) relative to internal  $\text{Me}_4\text{Si}$  (TMS) unless otherwise noted and coupling constants (J) are reported in Hertz (Hz).  $^{31}\text{P}$  chemical shifts are reported in parts per million (ppm) relative to an external 85% phosphoric acid standard.

UV-Vis spectra were obtained on a Varian Cary 50 spectrophotometer. Electrochemical studies were performed on a BAS 100B electrochemical analyzer in 0.1 M aq. NaOAc solution using a glassy carbon working electrode, a platinum wire auxiliary electrode, and Ag/AgCl reference electrode. Acid inertness studies were carried out under *pseudo* first-order conditions in 5M HCl solutions at  $90^\circ$  by monitoring the time-dependent decay of the electronic absorption maximum at 630 nm.

#### Synthesis and characterization of precursor 4 and ligand 2:

##### **1,4,8,11-tetraazabicyclo[6.6.2]hexadecane-4,11-bis(methanephosphonic acid diethyl ester)**

(4). Triethyl phosphite (0.18 mL, 1.0 mmol) and paraformaldehyde (32.5 mg, 2.5 molar equivalents of  $\text{CH}_2\text{O}$ ) were added to a solution of 1,4,8,11-tetraazabicyclo[6.6.2]-hexadecane (3) (0.0982 g, 0.4338 mmol) in 1.5 mL of dry THF and stirred under  $\text{N}_2$  for 4 days. The solvent was removed, the residue was dissolved in  $\text{H}_2\text{O}$  (20 mL), and the solution was made strongly basic (pH=14, slow addition of KOH pellets). The resulting solution was extracted with toluene (5 x 11 mL), the combined organic phases were dried over anhyd  $\text{Na}_2\text{SO}_4$ , the solvent was removed under aspirator pressure, and the residual solvent was removed under vacuum to give product pure by NMR (0.2156 g, 94%) as a waxy white solid 4: mp  $42\text{-}44^\circ\text{C}$ ;  $\nu_{\text{max}}(\text{CH}_2\text{Cl}_2)/\text{cm}^{-1}$  3476, 2980, 2905, 2799, 1669, 1446, 1390, 1366, 1343, 1323, 1292, 1245, 1161, 1126, 1098, 1028;  $\delta_{\text{H}}$  ( $\text{CDCl}_3$ , 500 MHz,  $\text{Me}_4\text{Si}$ ) 1.22-1.32 (14 H, m), 1.32-1.41 (2 H, m), 2.20-2.28 (4 H, m), 2.27-2.35 (2 H, XX' of AA'XX', cross-bridge NCHHCHHN), 2.38 (2 H, dt,  $J$  12.0 and 3.2), 2.50-2.75 (6 H, m), 2.60 (2 H, dd,  $^2J_{\text{HH}} -15.6$ ,  $^2J_{\text{HP}} -2.2$ , NCHHP) 2.77-2.87 (2 H m), 2.82 (2 H,  $t_{\text{app}}$ ,  $^2J_{\text{HH}} -16.0$ ,  $^2J_{\text{HP}} -16.0$ , NCHHP), 3.04-3.13 (2 H, AA' of AA'XX', cross-bridge NCHHCHHN), 3.70 (2 H, tt,  $J$  11.7 and 4.2), 3.99-4.10 (8 H, m,  $\text{P}(\text{O})\text{OCH}_2\text{CH}_3$ );  $\delta_{\text{C}}$  ( $\text{CDCl}_3$ , 125.68 MHz,  $\text{Me}_4\text{Si}$ ) 15.54 (2 C, d,  $^3J_{\text{PC}} 4.8$ ,  $\text{OCH}_2\text{CH}_3$ ), 15.59 (2 C, d,  $^3J_{\text{PC}} 5.8$ ,  $\text{OCH}_2\text{CH}_3$ ), 27.10 ( $\text{C}_{6,13}$ ),

49.24 (2 C, d,  $^1J_{PC}$  160.3, NCH<sub>2</sub>P), 49.88 (coincident with downfield line of doublet at 49.24), 54.94 (2 C, d  $^3J_{PC}$  15.4, C<sub>5,12</sub>), 55.55, 55.79 (C<sub>15,16</sub>), 59.41, 60.24 (2 C, d,  $^2J_{PC}$  6.7, OCH<sub>2</sub>CH<sub>3</sub>), 60.47 (2 C, d,  $^2J_{PC}$  7.7, OCH<sub>2</sub>CH<sub>3</sub>); [Note:  $^1\text{H}$ -COSY and gHMQC experiments aided resonance assignments (see structure below for compound numbering)];  $\delta_{\text{P}}$   $^{31}\text{P}\{^1\text{H}\}$  (CDCl<sub>3</sub>, 161.83 MHz, external 85% phosphoric acid) 26.98; HRFABMS,  $m/z$  (M+H)<sup>+</sup> exact mass for C<sub>22</sub>H<sub>49</sub>N<sub>4</sub>O<sub>6</sub>P<sub>2</sub>: 527.3127; Found: 527.3127 (error -0.8 mmu/-1.6 ppm).

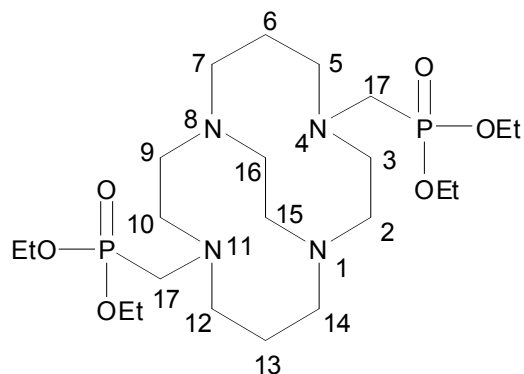

Numbering for 4.

### 1,4,8,11-Tetraazabicyclo[6.6.2]hexadecane-4,11-bis(methanephosphonic acid)

(H<sub>2</sub>·0.6HCl·1.1H<sub>2</sub>O). 0.3440 g (0.6533 mmol) of 4 was dissolved in 32 mL of 6M HCl and refluxed under N<sub>2</sub> for 1 day. The solvent was removed under reduced pressure and the crude product was dissolved in 4 mL of H<sub>2</sub>O and chromatographed using a weakly acidic cation exchange column (Amberlite CG50, H<sup>+</sup> form, 7.7 g, column size = 27 cm x 2 cm). The product was eluted with H<sub>2</sub>O (first 30 mL of eluant was discarded), fractions containing the product were combined (35 fractions, 3 mL each), the solvent was removed under reduced pressure, and residual solvent was removed under vacuum to give H<sub>2</sub>·0.6HCl·1.1H<sub>2</sub>O (0.1919 g, 64%) as a white solid: mp 182-185 °C (Found: C, 36.56; H, 7.84; N, 12.06; Cl, 4.81. Calc. for C<sub>14</sub>H<sub>32</sub>N<sub>4</sub>O<sub>6</sub>P<sub>2</sub>·(HCl)<sub>0.6</sub>·(H<sub>2</sub>O)<sub>1.1</sub>: C, 36.87; H, 7.69; N 12.28; Cl, 4.66%);  $\nu_{\text{max}}$ (KBr)/cm<sup>-1</sup> 3397 (br), 2983, 2851, 1655, 1491, 1470, 1241, 1183, 1097, 1073, 1047, 903;  $\delta_{\text{H}}$  (D<sub>2</sub>O, 500 MHz, internal ref CH<sub>3</sub>CN set to 2.06) 1.74-1.83 (2 H, dm,  $J$  16.6,  $H_{6\text{eq}}$ ), 2.29-2.42 (2 H, qm-like,  $H_{6\text{ax}}$ ), 2.49-2.58 (2 H, dm,  $J$  13.9,  $H_{2\text{eq}}$ ), 2.80-2.93 (4 H, m,  $H_{15\text{ BB}'}$  of AA'BB' and  $H_7$ ), 2.95-3.18 (8 H, m,  $H_{15\text{ AA}'}$  of AA'BB',  $H_7$ ,  $H_{3\text{eq}}$ , NCHHP), 3.29-3.37 (2 H, dm,  $J$  13.2,  $H_{5\text{eq}}$ ), 3.45 (2 H, td,  $J$  13.7 and 3.7,  $H_{2\text{ax}}$ ), 3.76 (2 H, tt<sub>app</sub>,  $J$  14.6 and 3.7,  $H_{3\text{ax}}$ ), 3.96 (2 H, td,  $J$  13.0 and 3.4,  $H_{5\text{ax}}$ ), and 4.17 (2 H, t<sub>app</sub>,  $^2J_{\text{HH}}$  -14.6,  $^2J_{\text{PC}}$  -14.6, NCHHP);  $\delta_{\text{C}}$  (D<sub>2</sub>O, 125.68 MHz, internal CH<sub>3</sub>CN set to 1.47)

20.23 ( $C_6$ ), 48.75 ( $C_{15}$ ), 52.01 (2 C, d,  $^1J_{PC}$  137.2,  $NCH_2P$ ), 52.34 (2 C, d,  $^3J_{PC}$  9.6,  $C_3$ ), 52.64 ( $C_2$ ), 58.17 (br,  $C_5$ ), 58.47 ( $C_7$ ) [Note:  $^1H$ -COSY and gHMQC experiments aided resonance assignments (see structure below for compound numbering)];  $\delta_P$   $^{31}P\{^1H\}$  ( $D_2O$ , 161.83 MHz, external 85% phosphoric acid) 9.48 (s); HRFABMS,  $m/z$  ( $M+H$ ) $^+$  exact mass for  $C_{14}H_{33}N_4O_6P_2$ : 415.1875; Found: 415.1877 (error -1.2 mmu/-2.9 ppm). Diffusion of acetone into an aqueous solution of  $H_2\cdot 0.6HCl\cdot 1.1H_2O$  produced crystals suitable for X-ray diffraction.

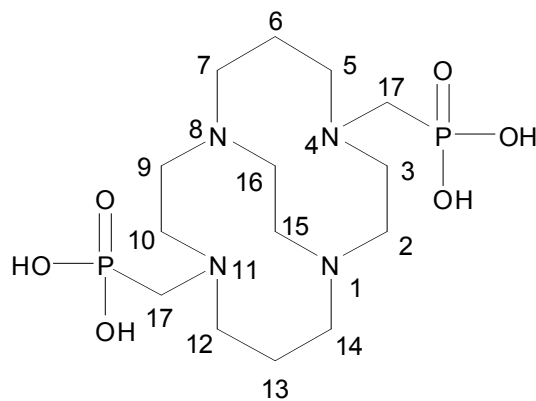

Numbering for  $H_2\cdot 2$

1. NMR spectra of precursor 4 and ligand 2:

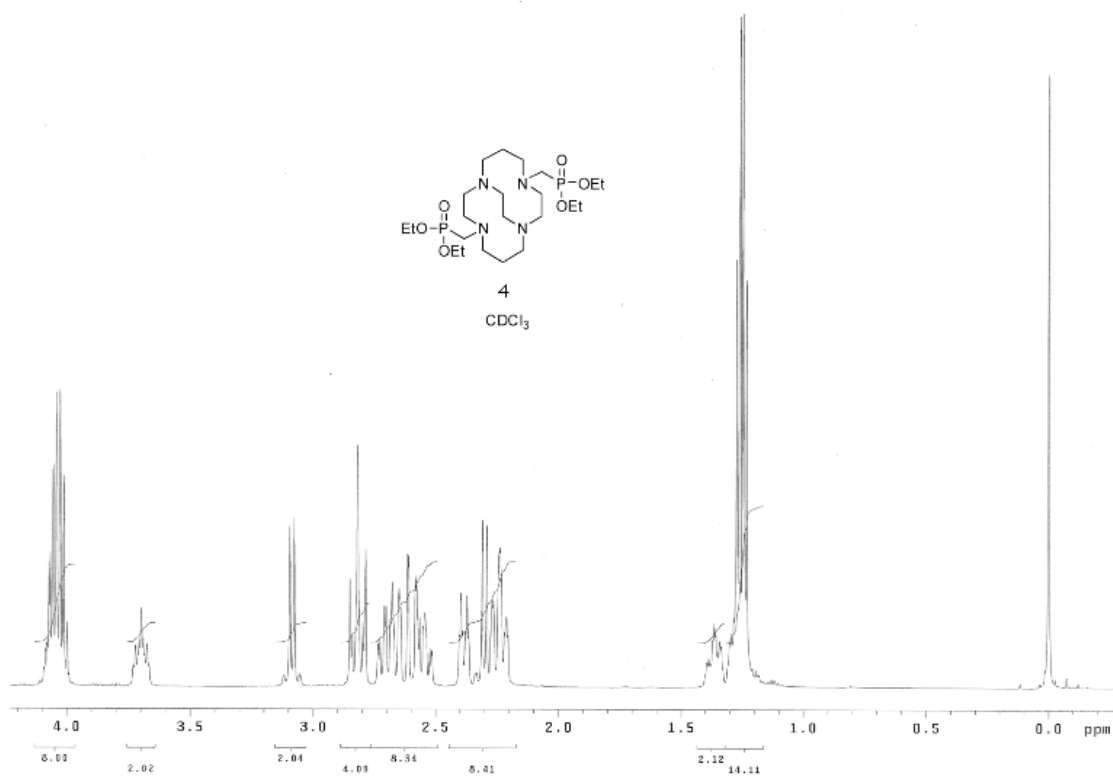

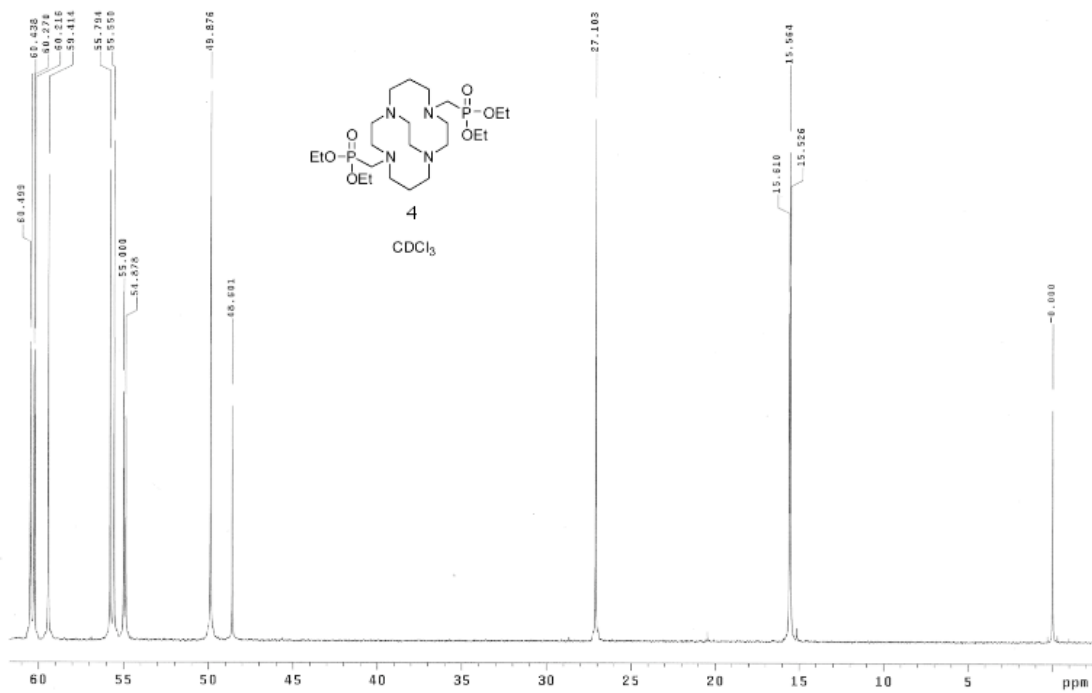

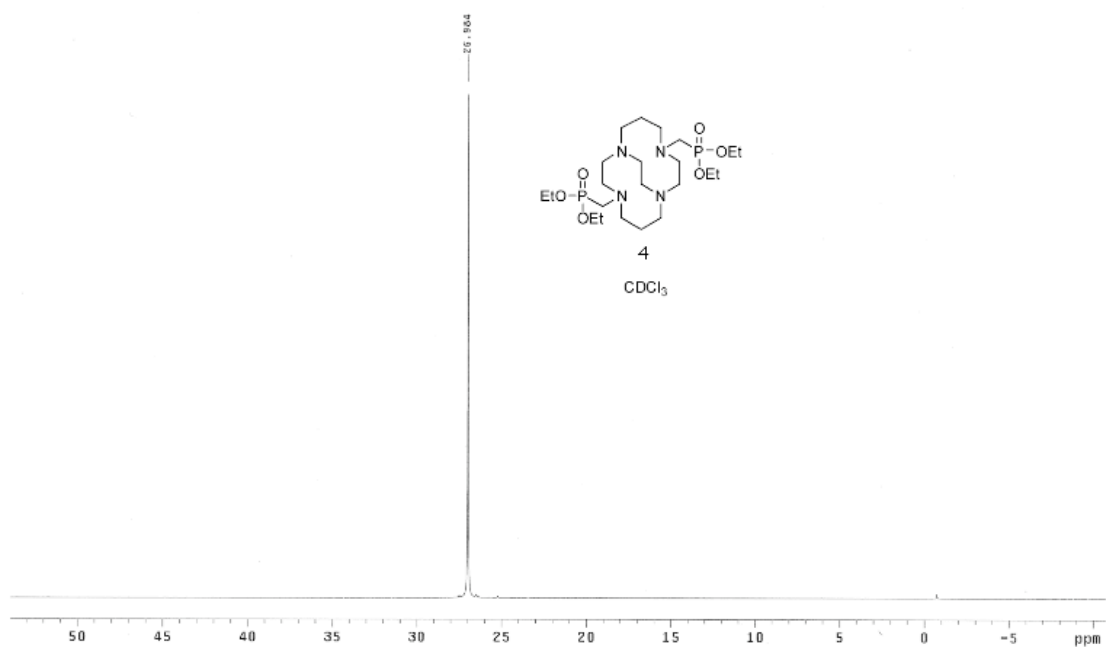

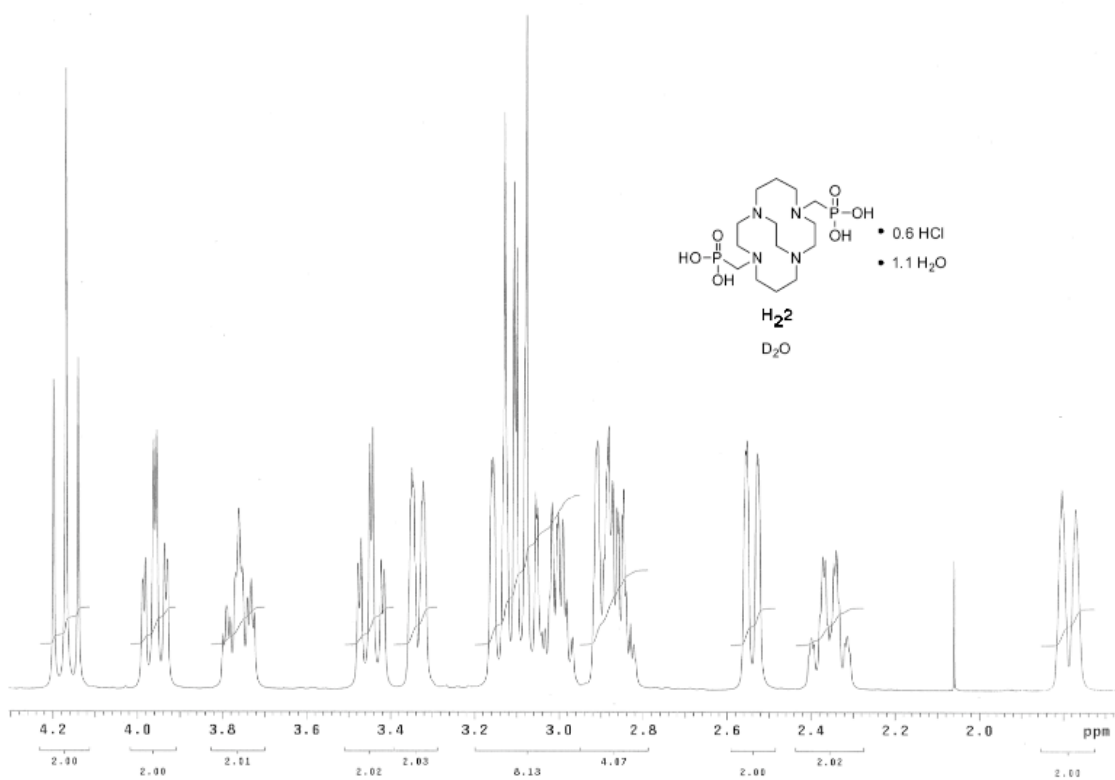



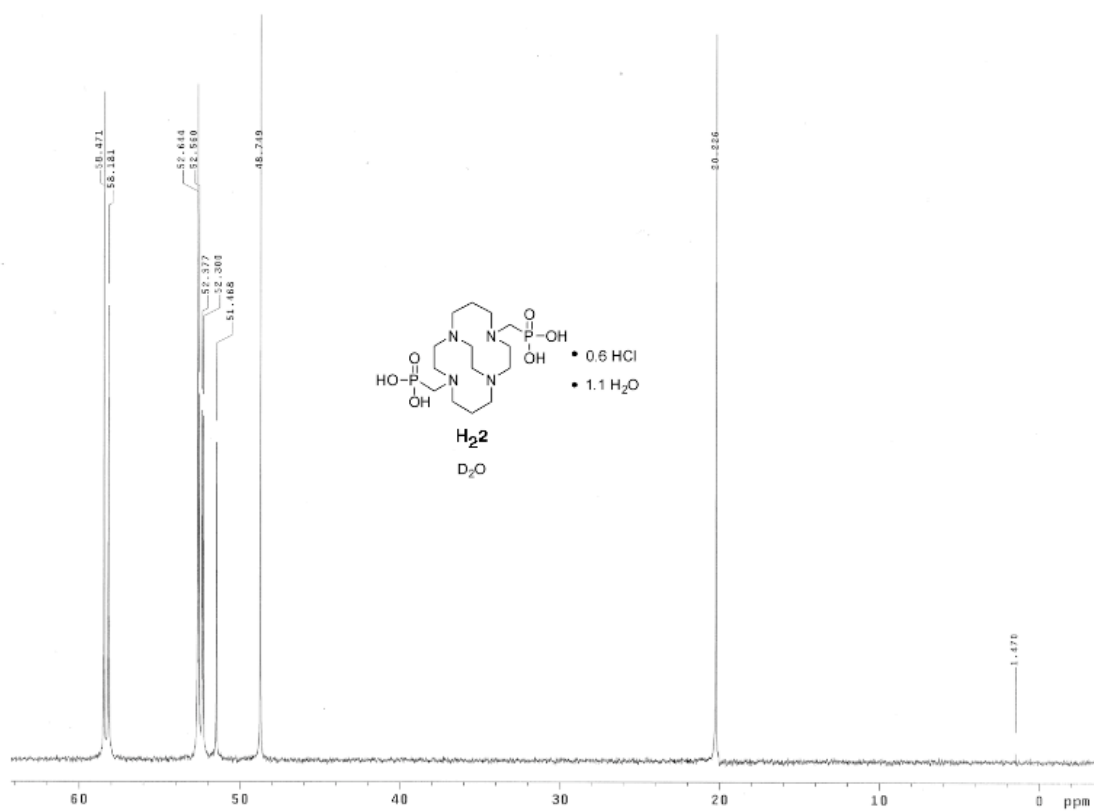

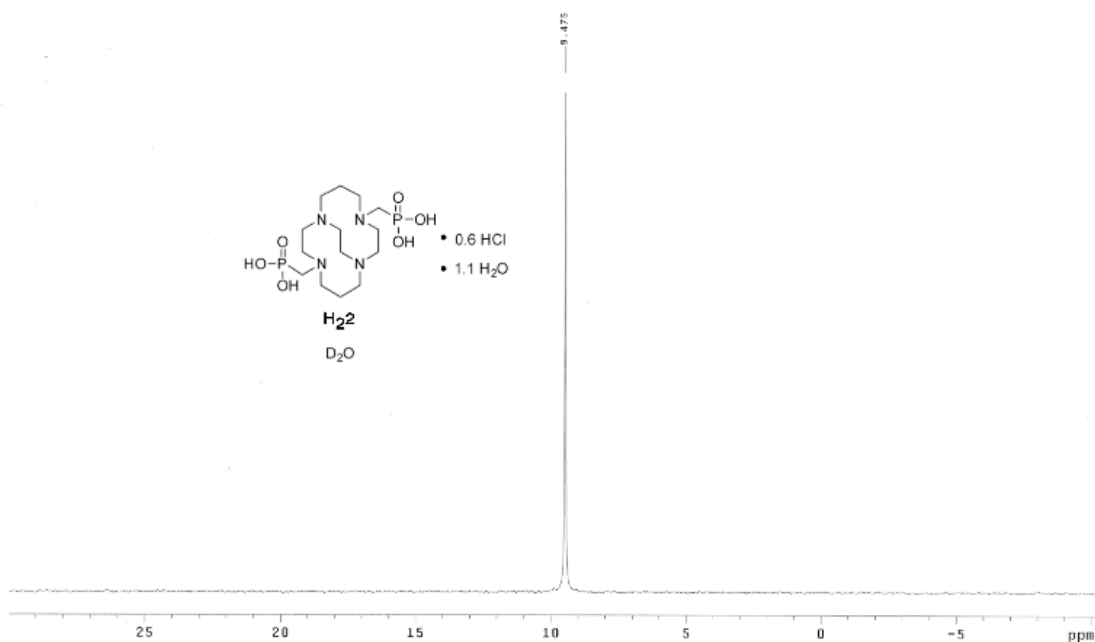

### Synthesis and characterization of the Cu(II) complex of **2**:

**Cu-2**: A solution of  $\text{CuCl}_2 \cdot 2\text{H}_2\text{O}$  (0.0132 g, 0.077 mmol) in 2 ml MeOH was added to a 2 ml solution of  $\text{H}_2\mathbf{2} \cdot 0.6\text{HCl} \cdot 1.1\text{H}_2\text{O}$  (0.035 g, 0.077 mmol) in MeOH. Aq. NaOH (0.3 ml of a 0.4 M solution) was added to raise the *pH* to 5. The resulting blue solution was evaporated to dryness and extracted with 1 ml of 1,1,1,3,3,3-hexafluoro-2-propanol. The NaCl precipitate was separated from the blue supernatant after centrifugation. Diethyl ether diffusion into the supernatant yielded blue microcrystals (0.047 g, 86%) (Found: C 29.48, H 4.96, N 7.91, Cl 1.78, P 8.66. Calc. for  $\text{C}_{14}\text{H}_{30}\text{N}_4\text{O}_6\text{P}_2\text{Cu} \cdot \text{H}_2\text{O} \cdot 0.3\text{NaCl} \cdot 1.2\text{C}_3\text{H}_2\text{F}_6\text{O}$ : C 29.64, H 4.86, N 7.86, Cl 1.49, P 8.69%); UV-Vis:  $\lambda_{\text{max}}$  (MeOH)/nm 639 ( $\epsilon/\text{dm}^3 \text{ mol}^{-1} \text{ cm}^{-1}$  35); HRFABMS (*m/z*)  $\text{C}_{14}\text{H}_{31}\text{N}_4\text{P}_2\text{Cu}$ : calcd 476.1015; found 476.1009  $[\text{M}+\text{H}]^+$  (error -0.6 mmu/-1.2 ppm). Cyclic voltammogram (0.1M aq. NaOAc): -0.96 V (Ag/AgCl) *quasi-reversible*. X-ray crystals were obtained by diethylether diffusion into a hexafluoro-2-propanol solution of the complex inside a 2-mm inner diameter glass tube.

### X-ray crystallography:

#### X-ray crystallographic data for H<sub>2</sub>2·HCl·4H<sub>2</sub>O:

A colorless crystal of sample Wong151 was mounted on a Cryoloop with Paratone-N oil. Data were collected on a Bruker APEX II CCD systems using Mo K alpha radiation in a stream of nitrogen gas at 100(2) K using phi and omega scans. Crystal-to-detector distance was 60 mm and exposure time was 10 seconds per frame using a scan width of 0.5°. Indexing and unit cell refinement indicated a centered, monoclinic lattice. The space group was found to be C2. The Bruker SHELXTL software program and scaled using the SADABS software program. Solution by direct methods (SHELXS) and all non-hydrogen atoms were refined anisotropically by full-matrix least-squares (SHELXL-97). All hydrogen atoms except those on O and N atoms were placed on their appropriate parent atom using a riding model. The oxygen atoms on O and N were found from a Fourier difference map, fixed at distances and angles using DFIX and DANG restraints and were allowed to refine. The hydrogen atom on O2 was set to half occupancy. Refinement indicated an enantiomeric mixture with roughly 31.9/68.1 % ratio of isomers.

Table 1. Crystal data and structure refinement for WONG151.

|                                 |                                          |                  |
|---------------------------------|------------------------------------------|------------------|
| Identification code             | wong151                                  |                  |
| Empirical formula               | C14 H41 Cl N4 O10 P2                     |                  |
| Formula weight                  | 522.90                                   |                  |
| Temperature                     | 100(2) K                                 |                  |
| Wavelength                      | 0.71073 Å                                |                  |
| Crystal system                  | Monoclinic                               |                  |
| Space group                     | C2                                       |                  |
| Unit cell dimensions            | a = 11.5219(16) Å                        | α = 90°.         |
|                                 | b = 11.7468(16) Å                        | β = 115.254(3)°. |
|                                 | c = 9.6554(13) Å                         | γ = 90°.         |
| Volume                          | 1181.9(3) Å <sup>3</sup>                 |                  |
| Z                               | 2                                        |                  |
| Density (calculated)            | 1.469 Mg/m <sup>3</sup>                  |                  |
| Absorption coefficient          | 0.353 mm <sup>-1</sup>                   |                  |
| F(000)                          | 560                                      |                  |
| Crystal size                    | 0.20 x 0.20 x 0.05 mm <sup>3</sup>       |                  |
| Crystal color / habit           | colorless / block                        |                  |
| Theta range for data collection | 2.33 to 28.20°.                          |                  |
| Index ranges                    | -14 ≤ h ≤ 15, -14 ≤ k ≤ 15, -12 ≤ l ≤ 12 |                  |
| Reflections collected           | 6044                                     |                  |
| Independent reflections         | 2590 [R(int) = 0.0271]                   |                  |
| Completeness to theta = 25.00°  | 100.0 %                                  |                  |
| Absorption correction           | multi-scan/sadabs                        |                  |
| Max. and min. transmission      | 0.9826 and 0.9327                        |                  |

|                                   |                                             |
|-----------------------------------|---------------------------------------------|
| Refinement method                 | Full-matrix least-squares on F <sup>2</sup> |
| Data / restraints / parameters    | 2590 / 7 / 167                              |
| Goodness-of-fit on F <sup>2</sup> | 1.066                                       |
| Final R indices [I>2sigma(I)]     | R1 = 0.0333, wR2 = 0.0805                   |
| R indices (all data)              | R1 = 0.0358, wR2 = 0.0817                   |
| Absolute structure parameter      | 0.32(7)                                     |
| Largest diff. peak and hole       | 0.511 and -0.207 e.Å <sup>-3</sup>          |

Table 2. Atomic coordinates (x 10<sup>4</sup>) and equivalent isotropic displacement parameters (Å<sup>2</sup>x 10<sup>3</sup>) for WONG151. U(eq) is defined as one third of the trace of the orthogonalized U<sup>ij</sup> tensor.

|       | x        | y        | z        | U(eq) |
|-------|----------|----------|----------|-------|
| C(1)  | 8166(2)  | -307(2)  | 7959(2)  | 17(1) |
| C(2)  | 8345(2)  | 1304(2)  | 6344(2)  | 19(1) |
| C(3)  | 9089(2)  | 2396(2)  | 6476(3)  | 21(1) |
| C(4)  | 10522(2) | 2279(2)  | 7530(2)  | 20(1) |
| C(5)  | 12104(2) | 1750(2)  | 10021(2) | 19(1) |
| C(6)  | 12515(2) | 1632(2)  | 11736(2) | 20(1) |
| C(7)  | 10577(2) | 3281(2)  | 9788(2)  | 20(1) |
| N(1)  | 8410(2)  | 943(2)   | 7880(2)  | 17(1) |
| N(2)  | 10783(2) | 2178(2)  | 9168(2)  | 17(1) |
| O(1)  | 8744(2)  | -1681(2) | 6035(2)  | 23(1) |
| O(2)  | 9340(2)  | -2321(1) | 8624(2)  | 20(1) |
| O(3)  | 10563(1) | -625(1)  | 8222(2)  | 20(1) |
| P(1)  | 9324(1)  | -1250(1) | 7708(1)  | 16(1) |
| Cl(1) | 10000    | 5000(1)  | 5000     | 24(1) |
| O(4)  | 8971(2)  | 5465(1)  | 7451(2)  | 26(1) |
| O(5)  | 6660(2)  | 4509(2)  | 6283(2)  | 31(1) |

Table 3. Bond lengths [Å] and angles [°] for WONG151.

|           |          |           |          |
|-----------|----------|-----------|----------|
| C(1)-N(1) | 1.503(3) | C(2)-C(3) | 1.518(3) |
| C(1)-P(1) | 1.828(2) | C(3)-C(4) | 1.532(3) |
| C(2)-N(1) | 1.513(3) | C(4)-N(2) | 1.483(3) |

|                  |            |             |            |
|------------------|------------|-------------|------------|
| C(5)-N(2)        | 1.475(3)   | N(1)-C(6)#1 | 1.506(3)   |
| C(5)-C(6)        | 1.522(3)   | O(1)-P(1)   | 1.5467(16) |
| C(6)-N(1)#1      | 1.506(3)   | O(2)-P(1)   | 1.5334(15) |
| C(7)-N(2)        | 1.488(3)   | O(3)-P(1)   | 1.4909(16) |
| C(7)-C(7)#1      | 1.550(4)   |             |            |
|                  |            |             |            |
| N(1)-C(1)-P(1)   | 115.00(15) |             |            |
| N(1)-C(2)-C(3)   | 111.38(17) |             |            |
| C(2)-C(3)-C(4)   | 112.94(18) |             |            |
| N(2)-C(4)-C(3)   | 112.71(19) |             |            |
| N(2)-C(5)-C(6)   | 114.03(17) |             |            |
| N(1)#1-C(6)-C(5) | 113.11(16) |             |            |
| N(2)-C(7)-C(7)#1 | 114.11(12) |             |            |
| C(1)-N(1)-C(6)#1 | 110.17(17) |             |            |
| C(1)-N(1)-C(2)   | 113.05(16) |             |            |
| C(6)#1-N(1)-C(2) | 110.29(16) |             |            |
| C(5)-N(2)-C(4)   | 108.31(16) |             |            |
| C(5)-N(2)-C(7)   | 112.04(15) |             |            |
| C(4)-N(2)-C(7)   | 111.39(16) |             |            |
| O(3)-P(1)-O(2)   | 116.02(9)  |             |            |
| O(3)-P(1)-O(1)   | 115.75(9)  |             |            |
| O(2)-P(1)-O(1)   | 103.16(9)  |             |            |
| O(3)-P(1)-C(1)   | 107.85(9)  |             |            |
| O(2)-P(1)-C(1)   | 104.53(9)  |             |            |
| O(1)-P(1)-C(1)   | 108.82(9)  |             |            |

---

Symmetry transformations used to generate  
equivalent atoms:

#1  $-x+2, y, -z+2$

Table 4. Anisotropic displacement parameters ( $\text{\AA}^2 \times 10^3$ ) for WONG151. The anisotropic displacement factor exponent takes the form:  $-2\pi^2 [ h^2 a^{*2} U^{11} + \dots + 2 h k a^* b^* U^{12} ]$

|       | $U^{11}$ | $U^{22}$ | $U^{33}$ | $U^{23}$ | $U^{13}$ | $U^{12}$ |
|-------|----------|----------|----------|----------|----------|----------|
| C(1)  | 18(1)    | 14(1)    | 19(1)    | 0(1)     | 9(1)     | -1(1)    |
| C(2)  | 22(1)    | 19(1)    | 14(1)    | 1(1)     | 5(1)     | 0(1)     |
| C(3)  | 21(1)    | 21(1)    | 18(1)    | 3(1)     | 7(1)     | -1(1)    |
| C(4)  | 21(1)    | 22(1)    | 18(1)    | 2(1)     | 8(1)     | -4(1)    |
| C(5)  | 16(1)    | 20(1)    | 21(1)    | 3(1)     | 9(1)     | 1(1)     |
| C(6)  | 14(1)    | 21(1)    | 22(1)    | 1(1)     | 5(1)     | -3(1)    |
| C(7)  | 20(1)    | 15(1)    | 22(1)    | 0(1)     | 8(1)     | -2(1)    |
| N(1)  | 16(1)    | 17(1)    | 16(1)    | 0(1)     | 6(1)     | -2(1)    |
| N(2)  | 16(1)    | 17(1)    | 18(1)    | 1(1)     | 7(1)     | 1(1)     |
| O(1)  | 27(1)    | 22(1)    | 18(1)    | 0(1)     | 8(1)     | -2(1)    |
| O(2)  | 22(1)    | 18(1)    | 18(1)    | 0(1)     | 7(1)     | -1(1)    |
| O(3)  | 18(1)    | 22(1)    | 20(1)    | -1(1)    | 8(1)     | -2(1)    |
| P(1)  | 17(1)    | 16(1)    | 16(1)    | -1(1)    | 7(1)     | -1(1)    |
| Cl(1) | 20(1)    | 27(1)    | 22(1)    | 0        | 7(1)     | 0        |
| O(4)  | 31(1)    | 21(1)    | 27(1)    | -3(1)    | 13(1)    | -1(1)    |
| O(5)  | 30(1)    | 43(1)    | 25(1)    | -10(1)   | 16(1)    | -11(1)   |

Table 5. Hydrogen coordinates ( $\times 10^4$ ) and isotropic displacement parameters ( $\text{\AA}^2 \times 10^3$ ) for WONG151.

|        | x        | y         | z        | U(eq)  |
|--------|----------|-----------|----------|--------|
| H(1A)  | 7299     | -487      | 7160     | 20     |
| H(1B)  | 8166     | -471      | 8965     | 20     |
| H(2A)  | 7438     | 1419      | 5614     | 23     |
| H(2B)  | 8703     | 692       | 5936     | 23     |
| H(3A)  | 8722     | 3007      | 6874     | 25     |
| H(3B)  | 8987     | 2626      | 5444     | 25     |
| H(4A)  | 10862    | 1597      | 7225     | 24     |
| H(4B)  | 10982    | 2952      | 7396     | 24     |
| H(5A)  | 12703    | 2275      | 9851     | 23     |
| H(5B)  | 12175    | 997       | 9602     | 23     |
| H(6A)  | 13370    | 1265      | 12205    | 24     |
| H(6B)  | 12598    | 2400      | 12190    | 24     |
| H(7A)  | 10442    | 3883      | 9017     | 23     |
| H(7B)  | 11364    | 3475      | 10712    | 23     |
| H(2O)  | 9857     | -2229     | 9545     | 29     |
| H(1N)  | 9220(30) | 1150(20)  | 8580(30) | 23(7)  |
| H(1O)  | 8720(30) | -1230(30) | 5410(30) | 34(8)  |
| H(4SA) | 9100(40) | 6100(20)  | 7810(40) | 61(11) |
| H(4SB) | 9260(20) | 5390(20)  | 6810(30) | 24(7)  |
| H(5SA) | 6260(30) | 4400(40)  | 6810(40) | 64(12) |
| H(5SB) | 7401(18) | 4750(20)  | 6850(30) | 30(8)  |

Table 6. Hydrogen bonds for WONG151 [ $\text{\AA}$  and  $^\circ$ ].

| D-H...A              | d(D-H)    | d(H...A)  | d(D...A)   | $\angle(\text{DHA})$ |
|----------------------|-----------|-----------|------------|----------------------|
| N(1)-H(1N)...N(2)    | 0.92(3)   | 2.04(3)   | 2.868(3)   | 149(2)               |
| O(4)-H(4SB)...Cl(1)  | 0.823(17) | 2.294(17) | 3.1142(19) | 175(3)               |
| O(5)-H(5SB)...O(4)   | 0.842(16) | 1.848(18) | 2.657(3)   | 160(3)               |
| O(2)-H(2O)...O(2)#1  | 0.84      | 1.61      | 2.434(3)   | 165.6                |
| N(1)-H(1N)...N(2)#1  | 0.92(3)   | 2.49(3)   | 2.973(2)   | 113.3(19)            |
| O(1)-H(1O)...O(5)#2  | 0.79(3)   | 1.74(3)   | 2.508(2)   | 164(3)               |
| O(4)-H(4SA)...O(2)#3 | 0.814(18) | 1.981(18) | 2.795(2)   | 178(4)               |
| O(5)-H(5SA)...O(3)#4 | 0.823(18) | 1.86(2)   | 2.673(2)   | 169(4)               |

Symmetry transformations used to generate equivalent atoms:

#1  $-x+2, y, -z+2$  #2  $-x+3/2, y-1/2, -z+1$  #3  $x, y+1, z$

#4  $x-1/2, y+1/2, z$

### X-ray crystallographic data for Cu-2:

A crystal was mounted on a Cryoloop with Paratone-N oil and cooled to  $-173^\circ\text{C}$  under a stream of dry nitrogen gas. Data was collected on a BRUKER APEX2 CCD X-ray system using Cu K alpha radiation at  $-173^\circ\text{C}$  and integrated using APEX2 software (SHELXL) corrected for adsorption using SADABS. Structure was solved by direct methods and all non-hydrogen atoms were refined as being anisotropic. Two molecules were found in the asymmetric unit. One of the molecules was disordered and this was treated by assuming a two-position disorder model. Although all the hydrogen atoms were not found, they were included in the chemical formula to account for F000, density and molecular weight.

Disorder associated with Cu-2 was treated by using a 50% occupancy model for atoms C15, C16, C17, C18, C23, C24, C25, C26, C27, N5, N6, O7, O8, O9, P3, O2SA, O2SB, O6SA, O6SB, C15', C16', C17', C18', C23', C24', C25', C26', C27', N5', N6', O7', O8', O9', P3' and their associated hydrogen atoms. Occupancy were set for the following atoms at values indicated: Atoms O5SA 40%, O5SB 60%, O7SA and O7SB both at 30 % occupancy while O7SC was at 40% occupancy; atoms Na1A and Na1B 75% and 25% , respectively. The hydrogen atoms on O8 and O8' were fixed in position with appropriate riding models.

Table 1. Crystal data and structure refinement for wong188.

|                     |                                      |
|---------------------|--------------------------------------|
| Identification code | wong188                              |
| Empirical formula   | C14 H34 Cl0.50 Cu N4 Na0.50 O9.50 P2 |
| Formula weight      | 565.15                               |
| Temperature         | 100(2) K                             |



|                                   |                                             |                            |
|-----------------------------------|---------------------------------------------|----------------------------|
| Wavelength                        | 1.54178 Å                                   |                            |
| Crystal system                    | Triclinic                                   |                            |
| Space group                       | P-1                                         |                            |
| Unit cell dimensions              | a = 9.5428(5) Å                             | $\alpha = 80.039(4)^\circ$ |
|                                   | b = 15.5173(7) Å                            | $\beta = 81.081(4)^\circ$  |
|                                   | c = 16.9240(10) Å                           | $\gamma = 89.874(3)^\circ$ |
| Volume                            | 2437.7(2) Å <sup>3</sup>                    |                            |
| Z                                 | 4                                           |                            |
| Density (calculated)              | 1.540 g/cm <sup>3</sup>                     |                            |
| Absorption coefficient            | 3.574 mm <sup>-1</sup>                      |                            |
| F(000)                            | 1180                                        |                            |
| Crystal size                      | 0.31 x 0.21 x 0.05 mm <sup>3</sup>          |                            |
| Theta range for data collection   | 4.28 to 59.37°                              |                            |
| Index ranges                      | -10 ≤ h ≤ 10, -17 ≤ k ≤ 17, -16 ≤ l ≤ 18    |                            |
| Reflections collected             | 16637                                       |                            |
| Independent reflections           | 6611 [R(int) = 0.0970]                      |                            |
| Completeness to theta = 59.37°    | 92.9 %                                      |                            |
| Absorption correction             | None                                        |                            |
| Refinement method                 | Full-matrix least-squares on F <sup>2</sup> |                            |
| Data / restraints / parameters    | 6611 / 0 / 593                              |                            |
| Goodness-of-fit on F <sup>2</sup> | 1.020                                       |                            |
| Final R indices [I > 2σ(I)]       | R1 = 0.0741, wR2 = 0.1968                   |                            |
| R indices (all data)              | R1 = 0.1213, wR2 = 0.2186                   |                            |
| Largest diff. peak and hole       | 0.941 and -0.730 e Å <sup>-3</sup>          |                            |

Table 2. Atomic coordinates ( $\times 10^4$ ) and equivalent isotropic displacement parameters ( $\text{\AA}^2 \times 10^3$ ) for wong188.  
 $U(\text{eq})$  is defined as one third of the trace of the orthogonalized  $U^{ij}$  tensor.

|       | x         | y        | z        | U(eq)  |
|-------|-----------|----------|----------|--------|
| Cu(1) | 3532(1)   | 5392(1)  | 7971(1)  | 17(1)  |
| Cu(2) | -1561(1)  | 355(1)   | 8003(1)  | 19(1)  |
| P(1)  | 3160(2)   | 6600(2)  | 9180(2)  | 36(1)  |
| P(2)  | 2181(2)   | 3816(2)  | 9406(2)  | 31(1)  |
| P(3)  | -2655(8)  | 1456(7)  | 9369(7)  | 14(3)  |
| P(3') | -3043(9)  | 1047(9)  | 9731(8)  | 23(3)  |
| P(4)  | -1868(2)  | -1372(2) | 9117(2)  | 36(1)  |
| Na(1) | 6652(5)   | 3467(2)  | 5571(2)  | 51(1)  |
| Cl(1) | -3171(2)  | -1137(1) | 5152(2)  | 39(1)  |
| O(1)  | 4074(7)   | 7460(5)  | 9046(5)  | 69(3)  |
| O(2)  | 2436(6)   | 6444(4)  | 10060(4) | 46(2)  |
| O(3)  | 4052(5)   | 5870(4)  | 8908(4)  | 30(2)  |
| O(4)  | 1754(6)   | 2949(4)  | 9120(4)  | 40(2)  |
| O(5)  | 1802(6)   | 3722(4)  | 10324(4) | 43(2)  |
| O(6)  | 1572(5)   | 4584(4)  | 8913(4)  | 29(2)  |
| O(7)  | -3017(11) | 1214(8)  | 10318(8) | 20(4)  |
| O(7') | -3246(12) | 613(9)   | 10631(8) | 21(4)  |
| O(8)  | -3072(11) | 2435(7)  | 9105(8)  | 16(4)  |
| O(8') | -3665(13) | 1937(7)  | 9648(8)  | 29(5)  |
| O(9)  | -3452(7)  | 699(7)   | 9026(6)  | 91(4)  |
| O(10) | -958(5)   | -549(3)  | 8861(3)  | 26(1)  |
| O(11) | -2514(6)  | -1603(5) | 10000(4) | 54(2)  |
| O(12) | -970(6)   | -2171(4) | 8870(4)  | 41(2)  |
| O(13) | -6353(7)  | -797(4)  | 5703(5)  | 49(2)  |
| O(14) | 8024(7)   | 2082(4)  | 4598(4)  | 49(2)  |
| O(15) | 3587(10)  | 2665(6)  | 5785(5)  | 92(3)  |
| O(16) | 1085(6)   | 5124(4)  | 10889(4) | 40(2)  |
| O(17) | -873(7)   | -2440(4) | 5747(4)  | 48(2)  |
| O(18) | -3893(7)  | -632(9)  | 10949(5) | 120(5) |
| O(19) | -1311(10) | -3706(8) | 4832(7)  | 121(5) |
| N(1)  | 2306(7)   | 6500(4)  | 7743(5)  | 25(2)  |
| N(2)  | 3113(7)   | 4799(4)  | 7043(4)  | 26(2)  |
| N(3)  | 4649(7)   | 4300(4)  | 8303(4)  | 23(2)  |

|       |           |          |          |        |
|-------|-----------|----------|----------|--------|
| N(4)  | 5176(6)   | 6159(4)  | 7072(4)  | 24(2)  |
| N(5)  | -439(8)   | 1284(4)  | 8378(6)  | 47(3)  |
| N(6)  | -2028(9)  | 1353(4)  | 7135(6)  | 47(3)  |
| N(7)  | 39(7)     | -13(5)   | 7054(4)  | 32(2)  |
| N(8)  | -2820(7)  | -623(4)  | 7726(4)  | 23(2)  |
| C(1)  | 1019(9)   | 6353(5)  | 7351(7)  | 38(3)  |
| C(2)  | 1290(9)   | 5902(6)  | 6628(6)  | 32(2)  |
| C(3)  | 1668(9)   | 4953(5)  | 6825(6)  | 32(2)  |
| C(5)  | 4484(9)   | 3656(5)  | 7758(6)  | 32(2)  |
| C(6A) | 3222(9)   | 3855(5)  | 7349(5)  | 25(2)  |
| C(6)  | 6200(8)   | 4541(6)  | 8272(6)  | 33(2)  |
| C(7)  | 6951(9)   | 5023(5)  | 7450(6)  | 35(2)  |
| C(8)  | 6638(8)   | 5991(5)  | 7259(6)  | 31(2)  |
| C(9)  | 4794(8)   | 7070(5)  | 7162(6)  | 31(2)  |
| C(10) | 3218(9)   | 7205(5)  | 7180(6)  | 34(2)  |
| C(11) | 4941(9)   | 5973(5)  | 6279(6)  | 31(2)  |
| C(12) | 4266(9)   | 5074(5)  | 6331(5)  | 31(2)  |
| C(13) | 1798(9)   | 6741(5)  | 8540(6)  | 34(2)  |
| C(14) | 4084(8)   | 3943(6)  | 9172(5)  | 28(2)  |
| C(15) | -596(15)  | 2160(6)  | 7856(11) | 106(7) |
| C(16) | -1982(14) | 2153(6)  | 7509(10) | 89(6)  |
| C(17) | -916(13)  | 1402(8)  | 6422(8)  | 75(5)  |
| C(18) | -247(10)  | 538(8)   | 6303(6)  | 55(3)  |
| C(19) | -307(9)   | -926(6)  | 7099(6)  | 37(2)  |
| C(20) | -1910(9)  | -1084(6) | 7148(6)  | 36(2)  |
| C(21) | -4123(8)  | -326(5)  | 7381(6)  | 27(2)  |
| C(22) | -3879(9)  | 451(5)   | 6685(6)  | 27(2)  |
| C(23) | -3496(10) | 1289(5)  | 6934(7)  | 41(3)  |
| C(24) | 1147(11)  | 1081(6)  | 8268(8)  | 56(4)  |
| C(25) | 1843(11)  | 956(7)   | 7452(7)  | 53(3)  |
| C(26) | 1496(9)   | 90(7)    | 7229(6)  | 44(3)  |
| C(27) | -935(12)  | 1248(8)  | 9281(9)  | 69(4)  |
| C(28) | -3294(8)  | -1207(6) | 8516(6)  | 32(2)  |

---

Table 3. Bond lengths [Å] and angles [°] for wong188.

---

|             |           |
|-------------|-----------|
| Cu(1)-O(3)  | 1.991(6)  |
| Cu(1)-N(2)  | 2.042(7)  |
| Cu(1)-N(3)  | 2.042(6)  |
| Cu(1)-N(1)  | 2.092(6)  |
| Cu(1)-N(4)  | 2.199(7)  |
| Cu(2)-O(10) | 1.989(5)  |
| Cu(2)-N(5)  | 2.041(7)  |
| Cu(2)-N(6)  | 2.041(8)  |
| Cu(2)-N(8)  | 2.096(6)  |
| Cu(2)-N(7)  | 2.188(7)  |
| Cu(2)-O(9)  | 2.426(7)  |
| P(1)-O(3)   | 1.507(6)  |
| P(1)-O(2)   | 1.520(7)  |
| P(1)-O(1)   | 1.559(6)  |
| P(1)-C(13)  | 1.806(10) |
| P(2)-O(6)   | 1.503(6)  |
| P(2)-O(5)   | 1.522(7)  |
| P(2)-O(4)   | 1.579(6)  |
| P(2)-C(14)  | 1.801(8)  |
| P(3)-P(3')  | 0.844(6)  |
| P(3)-O(8')  | 1.300(12) |
| P(3)-O(7)   | 1.568(19) |
| P(3)-O(8)   | 1.576(15) |
| P(3)-O(9)   | 1.634(11) |
| P(3)-C(27)  | 1.660(11) |
| P(3')-O(7)  | 1.071(13) |
| P(3')-O(8') | 1.494(15) |
| P(3')-O(9)  | 1.496(9)  |
| P(3')-O(7') | 1.54(2)   |
| P(3')-C(27) | 2.042(17) |
| P(3')-O(8)  | 2.23(2)   |
| P(4)-O(10)  | 1.506(6)  |
| P(4)-O(11)  | 1.506(7)  |
| P(4)-O(12)  | 1.585(6)  |
| P(4)-C(28)  | 1.815(8)  |
| O(7)-O(7')  | 0.997(13) |

|             |           |
|-------------|-----------|
| O(7)-O(8')  | 1.643(17) |
| O(8)-O(8')  | 1.166(14) |
| N(1)-C(13)  | 1.471(11) |
| N(1)-C(10)  | 1.499(10) |
| N(1)-C(1)   | 1.520(11) |
| N(2)-C(6A)  | 1.476(10) |
| N(2)-C(3)   | 1.490(10) |
| N(2)-C(12)  | 1.502(11) |
| N(3)-C(14)  | 1.495(11) |
| N(3)-C(5)   | 1.496(11) |
| N(3)-C(6)   | 1.518(10) |
| N(4)-C(11)  | 1.469(11) |
| N(4)-C(9)   | 1.487(10) |
| N(4)-C(8)   | 1.490(10) |
| N(5)-C(15)  | 1.509(13) |
| N(5)-C(27)  | 1.518(16) |
| N(5)-C(24)  | 1.535(13) |
| N(6)-C(17)  | 1.469(16) |
| N(6)-C(16)  | 1.492(13) |
| N(6)-C(23)  | 1.500(11) |
| N(7)-C(19)  | 1.441(11) |
| N(7)-C(18)  | 1.467(12) |
| N(7)-C(26)  | 1.480(11) |
| N(8)-C(20)  | 1.483(11) |
| N(8)-C(28)  | 1.486(11) |
| N(8)-C(21)  | 1.493(10) |
| C(1)-C(2)   | 1.500(13) |
| C(2)-C(3)   | 1.508(12) |
| C(5)-C(6A)  | 1.486(12) |
| C(6)-C(7)   | 1.530(13) |
| C(7)-C(8)   | 1.520(12) |
| C(9)-C(10)  | 1.514(12) |
| C(11)-C(12) | 1.521(12) |
| C(15)-C(16) | 1.529(14) |
| C(17)-C(18) | 1.516(17) |
| C(19)-C(20) | 1.537(12) |
| C(21)-C(22) | 1.523(12) |
| C(22)-C(23) | 1.497(12) |

|                  |           |
|------------------|-----------|
| C(24)-C(25)      | 1.481(16) |
| C(25)-C(26)      | 1.507(15) |
| O(3)-Cu(1)-N(2)  | 174.4(2)  |
| O(3)-Cu(1)-N(3)  | 88.9(3)   |
| N(2)-Cu(1)-N(3)  | 85.5(3)   |
| O(3)-Cu(1)-N(1)  | 87.4(3)   |
| N(2)-Cu(1)-N(1)  | 98.2(3)   |
| N(3)-Cu(1)-N(1)  | 174.8(3)  |
| O(3)-Cu(1)-N(4)  | 94.6(3)   |
| N(2)-Cu(1)-N(4)  | 86.2(3)   |
| N(3)-Cu(1)-N(4)  | 99.7(2)   |
| N(1)-Cu(1)-N(4)  | 84.4(2)   |
| O(10)-Cu(2)-N(5) | 89.7(3)   |
| O(10)-Cu(2)-N(6) | 174.7(3)  |
| N(5)-Cu(2)-N(6)  | 85.3(3)   |
| O(10)-Cu(2)-N(8) | 87.5(2)   |
| N(5)-Cu(2)-N(8)  | 174.7(3)  |
| N(6)-Cu(2)-N(8)  | 97.5(3)   |
| O(10)-Cu(2)-N(7) | 92.8(3)   |
| N(5)-Cu(2)-N(7)  | 100.1(3)  |
| N(6)-Cu(2)-N(7)  | 86.4(3)   |
| N(8)-Cu(2)-N(7)  | 84.5(3)   |
| O(10)-Cu(2)-O(9) | 87.7(3)   |
| N(5)-Cu(2)-O(9)  | 83.8(3)   |
| N(6)-Cu(2)-O(9)  | 93.4(4)   |
| N(8)-Cu(2)-O(9)  | 91.5(3)   |
| N(7)-Cu(2)-O(9)  | 176.0(3)  |
| O(3)-P(1)-O(2)   | 116.5(4)  |
| O(3)-P(1)-O(1)   | 110.4(3)  |
| O(2)-P(1)-O(1)   | 106.8(4)  |
| O(3)-P(1)-C(13)  | 105.1(4)  |
| O(2)-P(1)-C(13)  | 108.0(4)  |
| O(1)-P(1)-C(13)  | 109.9(5)  |
| O(6)-P(2)-O(5)   | 116.3(4)  |
| O(6)-P(2)-O(4)   | 109.0(3)  |
| O(5)-P(2)-O(4)   | 110.1(4)  |
| O(6)-P(2)-C(14)  | 107.1(3)  |

|                   |           |
|-------------------|-----------|
| O(5)-P(2)-C(14)   | 106.5(4)  |
| O(4)-P(2)-C(14)   | 107.5(4)  |
| P(3')-P(3)-O(8')  | 85.6(12)  |
| P(3')-P(3)-O(7)   | 40.1(8)   |
| O(8')-P(3)-O(7)   | 69.2(9)   |
| P(3')-P(3)-O(8)   | 132.1(9)  |
| O(8')-P(3)-O(8)   | 46.6(7)   |
| O(7)-P(3)-O(8)    | 108.3(7)  |
| P(3')-P(3)-O(9)   | 65.5(8)   |
| O(8')-P(3)-O(9)   | 105.2(7)  |
| O(7)-P(3)-O(9)    | 105.2(11) |
| O(8)-P(3)-O(9)    | 117.7(6)  |
| P(3')-P(3)-C(27)  | 104.5(9)  |
| O(8')-P(3)-C(27)  | 146.2(8)  |
| O(7)-P(3)-C(27)   | 97.8(7)   |
| O(8)-P(3)-C(27)   | 117.0(11) |
| O(9)-P(3)-C(27)   | 108.4(5)  |
| P(3)-P(3')-O(7)   | 109.4(15) |
| P(3)-P(3')-O(8')  | 60.1(10)  |
| O(7)-P(3')-O(8')  | 77.7(9)   |
| P(3)-P(3')-O(9)   | 83.6(10)  |
| O(7)-P(3')-O(9)   | 164.5(16) |
| O(8')-P(3')-O(9)  | 102.9(8)  |
| P(3)-P(3')-O(7')  | 147.2(10) |
| O(7)-P(3')-O(7')  | 40.1(9)   |
| O(8')-P(3')-O(7') | 110.0(9)  |
| O(9)-P(3')-O(7')  | 128.6(12) |
| P(3)-P(3')-C(27)  | 51.9(7)   |
| O(7)-P(3')-C(27)  | 97.9(9)   |
| O(8')-P(3')-C(27) | 105.5(11) |
| O(9)-P(3')-C(27)  | 96.8(7)   |
| O(7')-P(3')-C(27) | 110.4(6)  |
| P(3)-P(3')-O(8)   | 31.6(6)   |
| O(7)-P(3')-O(8)   | 94.4(11)  |
| O(8')-P(3')-O(8)  | 28.6(7)   |
| O(9)-P(3')-O(8)   | 92.8(8)   |
| O(7')-P(3')-O(8)  | 133.1(7)  |
| C(27)-P(3')-O(8)  | 80.3(7)   |

|                  |           |
|------------------|-----------|
| O(10)-P(4)-O(11) | 117.4(4)  |
| O(10)-P(4)-O(12) | 108.9(3)  |
| O(11)-P(4)-O(12) | 108.6(4)  |
| O(10)-P(4)-C(28) | 105.0(3)  |
| O(11)-P(4)-C(28) | 108.3(4)  |
| O(12)-P(4)-C(28) | 108.2(4)  |
| P(1)-O(3)-Cu(1)  | 116.5(3)  |
| O(7')-O(7)-P(3') | 96.0(16)  |
| O(7')-O(7)-P(3)  | 125.2(14) |
| P(3')-O(7)-P(3)  | 30.5(8)   |
| O(7')-O(7)-O(8') | 139.1(13) |
| P(3')-O(7)-O(8') | 62.7(10)  |
| P(3)-O(7)-O(8')  | 47.7(6)   |
| O(7)-O(7')-P(3') | 43.9(10)  |
| O(8')-O(8)-P(3)  | 54.1(8)   |
| O(8')-O(8)-P(3') | 37.9(7)   |
| P(3)-O(8)-P(3')  | 16.3(4)   |
| O(8)-O(8')-P(3)  | 79.3(12)  |
| O(8)-O(8')-P(3') | 113.5(12) |
| P(3)-O(8')-P(3') | 34.3(4)   |
| O(8)-O(8')-O(7)  | 129.5(11) |
| P(3)-O(8')-O(7)  | 63.1(8)   |
| P(3')-O(8')-O(7) | 39.6(6)   |
| P(3')-O(9)-P(3)  | 30.9(3)   |
| P(3')-O(9)-Cu(2) | 117.8(5)  |
| P(3)-O(9)-Cu(2)  | 100.2(5)  |
| P(4)-O(10)-Cu(2) | 116.6(3)  |
| C(13)-N(1)-C(10) | 112.7(6)  |
| C(13)-N(1)-C(1)  | 107.9(7)  |
| C(10)-N(1)-C(1)  | 107.5(7)  |
| C(13)-N(1)-Cu(1) | 106.0(5)  |
| C(10)-N(1)-Cu(1) | 108.5(5)  |
| C(1)-N(1)-Cu(1)  | 114.3(5)  |
| C(6A)-N(2)-C(3)  | 108.1(6)  |
| C(6A)-N(2)-C(12) | 109.1(6)  |
| C(3)-N(2)-C(12)  | 112.4(7)  |
| C(6A)-N(2)-Cu(1) | 104.5(5)  |
| C(3)-N(2)-Cu(1)  | 114.6(5)  |



|                  |           |
|------------------|-----------|
| C(12)-N(2)-Cu(1) | 107.8(5)  |
| C(14)-N(3)-C(5)  | 112.1(6)  |
| C(14)-N(3)-C(6)  | 106.4(6)  |
| C(5)-N(3)-C(6)   | 111.2(7)  |
| C(14)-N(3)-Cu(1) | 107.2(5)  |
| C(5)-N(3)-Cu(1)  | 109.4(5)  |
| C(6)-N(3)-Cu(1)  | 110.5(5)  |
| C(11)-N(4)-C(9)  | 111.4(7)  |
| C(11)-N(4)-C(8)  | 114.8(7)  |
| C(9)-N(4)-C(8)   | 109.5(6)  |
| C(11)-N(4)-Cu(1) | 105.7(5)  |
| C(9)-N(4)-Cu(1)  | 101.7(5)  |
| C(8)-N(4)-Cu(1)  | 113.0(5)  |
| C(15)-N(5)-C(27) | 114.8(9)  |
| C(15)-N(5)-C(24) | 107.2(9)  |
| C(27)-N(5)-C(24) | 107.4(8)  |
| C(15)-N(5)-Cu(2) | 109.1(6)  |
| C(27)-N(5)-Cu(2) | 108.1(7)  |
| C(24)-N(5)-Cu(2) | 110.3(5)  |
| C(17)-N(6)-C(16) | 110.7(10) |
| C(17)-N(6)-C(23) | 113.0(9)  |
| C(16)-N(6)-C(23) | 106.3(8)  |
| C(17)-N(6)-Cu(2) | 107.9(6)  |
| C(16)-N(6)-Cu(2) | 104.7(7)  |
| C(23)-N(6)-Cu(2) | 114.0(6)  |
| C(19)-N(7)-C(18) | 113.1(8)  |
| C(19)-N(7)-C(26) | 110.2(7)  |
| C(18)-N(7)-C(26) | 114.3(7)  |
| C(19)-N(7)-Cu(2) | 102.2(5)  |
| C(18)-N(7)-Cu(2) | 104.4(6)  |
| C(26)-N(7)-Cu(2) | 111.8(6)  |
| C(20)-N(8)-C(28) | 111.8(7)  |
| C(20)-N(8)-C(21) | 109.2(7)  |
| C(28)-N(8)-C(21) | 107.1(6)  |
| C(20)-N(8)-Cu(2) | 107.5(5)  |
| C(28)-N(8)-Cu(2) | 105.0(5)  |
| C(21)-N(8)-Cu(2) | 116.3(5)  |
| C(2)-C(1)-N(1)   | 115.8(7)  |

|                   |           |
|-------------------|-----------|
| C(1)-C(2)-C(3)    | 114.2(7)  |
| N(2)-C(3)-C(2)    | 115.1(7)  |
| C(6A)-C(5)-N(3)   | 110.6(6)  |
| N(2)-C(6A)-C(5)   | 112.4(7)  |
| N(3)-C(6)-C(7)    | 115.3(7)  |
| C(8)-C(7)-C(6)    | 115.1(7)  |
| N(4)-C(8)-C(7)    | 113.2(7)  |
| N(4)-C(9)-C(10)   | 111.4(7)  |
| N(1)-C(10)-C(9)   | 113.7(7)  |
| N(4)-C(11)-C(12)  | 113.2(7)  |
| N(2)-C(12)-C(11)  | 115.5(7)  |
| N(1)-C(13)-P(1)   | 111.1(6)  |
| N(3)-C(14)-P(2)   | 115.0(5)  |
| N(5)-C(15)-C(16)  | 109.2(8)  |
| N(6)-C(16)-C(15)  | 108.1(9)  |
| N(6)-C(17)-C(18)  | 115.0(8)  |
| N(7)-C(18)-C(17)  | 114.2(10) |
| N(7)-C(19)-C(20)  | 111.7(7)  |
| N(8)-C(20)-C(19)  | 114.8(7)  |
| N(8)-C(21)-C(22)  | 114.4(6)  |
| C(23)-C(22)-C(21) | 114.1(8)  |
| C(22)-C(23)-N(6)  | 116.0(7)  |
| C(25)-C(24)-N(5)  | 117.9(9)  |
| C(24)-C(25)-C(26) | 114.5(8)  |
| N(7)-C(26)-C(25)  | 115.7(8)  |
| N(5)-C(27)-P(3)   | 105.4(8)  |
| N(5)-C(27)-P(3')  | 119.2(7)  |
| P(3)-C(27)-P(3')  | 23.6(3)   |
| N(8)-C(28)-P(4)   | 111.0(5)  |

---

Table 4. Anisotropic displacement parameters ( $\text{\AA}^2 \times 10^3$ ) for wong188. The anisotropic displacement factor exponent takes the form:  $-2\pi^2[h^2 a^{*2}U^{11} + \dots + 2 h k a^* b^* U^{12}]$

|       | U <sup>11</sup> | U <sup>22</sup> | U <sup>33</sup> | U <sup>23</sup> | U <sup>13</sup> | U <sup>12</sup> |
|-------|-----------------|-----------------|-----------------|-----------------|-----------------|-----------------|
| Cu(1) | 20(1)           | 13(1)           | 19(1)           | -2(1)           | -3(1)           | 2(1)            |
| Cu(2) | 21(1)           | 13(1)           | 26(1)           | -6(1)           | -10(1)          | 4(1)            |
| P(1)  | 28(1)           | 38(1)           | 44(2)           | -29(1)          | 16(1)           | -18(1)          |
| P(2)  | 21(1)           | 38(1)           | 32(2)           | 10(1)           | -10(1)          | -13(1)          |
| P(3)  | 16(3)           | 8(4)            | 18(5)           | -2(4)           | -1(3)           | -2(3)           |
| P(3') | 15(3)           | 23(6)           | 32(6)           | -8(5)           | -5(3)           | 7(3)            |
| P(4)  | 17(1)           | 42(1)           | 39(2)           | 18(1)           | 0(1)            | 6(1)            |
| Na(1) | 80(3)           | 36(2)           | 28(3)           | 7(2)            | 4(2)            | 32(2)           |
| Cl(1) | 36(1)           | 41(1)           | 41(2)           | -12(1)          | -5(1)           | 2(1)            |
| O(1)  | 39(4)           | 66(5)           | 104(7)          | -66(5)          | 41(4)           | -40(4)          |
| O(2)  | 35(4)           | 57(4)           | 48(5)           | -38(4)          | 15(3)           | -19(3)          |
| O(3)  | 15(3)           | 43(3)           | 37(4)           | -25(3)          | -3(3)           | -6(3)           |
| O(4)  | 35(4)           | 35(3)           | 46(5)           | 13(3)           | -20(3)          | -17(3)          |
| O(5)  | 29(3)           | 71(4)           | 22(4)           | 12(3)           | -5(3)           | -26(3)          |
| O(6)  | 19(3)           | 38(3)           | 23(4)           | 9(3)            | -4(3)           | -6(3)           |
| O(7)  | 31(7)           | 16(8)           | 17(9)           | -8(6)           | -6(6)           | -4(5)           |
| O(8)  | 21(6)           | 11(7)           | 13(9)           | 2(6)            | 4(5)            | 2(5)            |
| O(8') | 40(8)           | 19(7)           | 33(11)          | -14(7)          | -12(7)          | 9(6)            |
| O(9)  | 35(4)           | 185(9)          | 101(8)          | -129(7)         | -42(5)          | 60(5)           |
| O(10) | 13(3)           | 37(3)           | 21(4)           | 7(3)            | -1(3)           | -6(2)           |
| O(11) | 22(3)           | 78(5)           | 41(5)           | 37(4)           | 6(3)            | 16(3)           |
| O(12) | 27(3)           | 31(3)           | 54(5)           | 18(3)           | 0(3)            | 11(3)           |
| O(13) | 47(4)           | 34(4)           | 61(6)           | -13(3)          | 12(4)           | -11(3)          |
| O(14) | 68(5)           | 32(4)           | 52(5)           | -10(3)          | -20(4)          | 2(3)            |
| O(15) | 115(8)          | 109(7)          | 50(6)           | -43(5)          | 27(5)           | -61(6)          |
| O(16) | 32(3)           | 63(4)           | 24(4)           | -12(3)          | 2(3)            | -21(3)          |
| O(17) | 59(5)           | 50(4)           | 36(5)           | -10(3)          | -2(4)           | 11(3)           |
| O(18) | 11(4)           | 318(15)         | 62(7)           | -110(9)         | -15(4)          | 24(6)           |
| O(19) | 81(6)           | 177(10)         | 132(10)         | -136(9)         | 18(6)           | -37(7)          |
| N(1)  | 27(4)           | 7(3)            | 37(5)           | -1(3)           | 7(3)            | -4(3)           |
| N(2)  | 37(4)           | 18(4)           | 25(5)           | -8(3)           | -8(4)           | 3(3)            |
| N(3)  | 20(4)           | 27(4)           | 20(5)           | 4(3)            | -4(3)           | -1(3)           |
| N(4)  | 17(4)           | 21(4)           | 29(5)           | 0(3)            | 2(3)            | 2(3)            |

|       |         |         |         |        |          |        |
|-------|---------|---------|---------|--------|----------|--------|
| N(5)  | 51(5)   | 13(4)   | 94(8)   | -19(4) | -54(5)   | 15(3)  |
| N(6)  | 42(5)   | 19(4)   | 86(8)   | 3(4)   | -44(5)   | -4(4)  |
| N(7)  | 20(4)   | 58(5)   | 16(5)   | 0(4)   | 0(3)     | -1(3)  |
| N(8)  | 23(4)   | 19(3)   | 25(5)   | -2(3)  | -1(3)    | 4(3)   |
| C(1)  | 20(5)   | 22(5)   | 65(8)   | 11(5)  | -4(5)    | 8(4)   |
| C(2)  | 32(5)   | 41(5)   | 24(6)   | 8(4)   | -21(4)   | -3(4)  |
| C(3)  | 30(5)   | 35(5)   | 35(7)   | -6(4)  | -16(5)   | -3(4)  |
| C(5)  | 32(5)   | 23(5)   | 39(7)   | -6(4)  | 2(4)     | 4(4)   |
| C(6A) | 40(5)   | 13(4)   | 25(6)   | -11(4) | -5(4)    | -2(4)  |
| C(6)  | 20(5)   | 30(5)   | 43(7)   | 10(4)  | -3(4)    | 10(4)  |
| C(7)  | 17(4)   | 31(5)   | 54(8)   | -5(5)  | 0(5)     | 6(4)   |
| C(8)  | 18(4)   | 43(5)   | 24(6)   | 6(4)   | 9(4)     | -4(4)  |
| C(9)  | 16(4)   | 30(5)   | 42(7)   | -3(4)  | 8(4)     | -3(4)  |
| C(10) | 36(5)   | 18(4)   | 42(7)   | 1(4)   | 3(5)     | -4(4)  |
| C(11) | 34(5)   | 37(5)   | 19(6)   | 2(4)   | 3(4)     | 12(4)  |
| C(12) | 41(5)   | 39(5)   | 15(6)   | -9(4)  | -6(4)    | 6(4)   |
| C(13) | 28(5)   | 16(4)   | 52(7)   | -10(4) | 11(5)    | -2(4)  |
| C(14) | 20(4)   | 35(5)   | 23(6)   | 14(4)  | -8(4)    | -10(4) |
| C(15) | 117(11) | 4(5)    | 227(19) | -9(7)  | -134(13) | 0(6)   |
| C(16) | 101(10) | 19(5)   | 177(16) | -16(7) | -116(11) | 8(6)   |
| C(17) | 51(8)   | 81(9)   | 78(11)  | 55(8)  | -42(7)   | -40(7) |
| C(18) | 24(5)   | 104(10) | 25(7)   | 21(6)  | -2(5)    | -27(6) |
| C(19) | 23(5)   | 47(6)   | 46(7)   | -29(5) | -2(5)    | 12(4)  |
| C(20) | 34(5)   | 37(5)   | 47(7)   | -23(5) | -15(5)   | 7(4)   |
| C(21) | 17(4)   | 29(5)   | 36(6)   | -7(4)  | -9(4)    | -3(4)  |
| C(22) | 18(4)   | 33(5)   | 30(6)   | -7(4)  | -7(4)    | -1(4)  |
| C(23) | 36(5)   | 25(5)   | 66(8)   | 3(5)   | -31(5)   | -3(4)  |
| C(24) | 54(7)   | 23(5)   | 101(12) | -4(6)  | -54(7)   | 4(5)   |
| C(25) | 35(6)   | 65(7)   | 50(9)   | 27(6)  | -15(6)   | -29(5) |
| C(26) | 12(4)   | 83(8)   | 34(7)   | -2(6)  | -4(4)    | 0(5)   |
| C(27) | 53(7)   | 88(9)   | 101(12) | -75(8) | -56(7)   | 52(6)  |
| C(28) | 17(4)   | 36(5)   | 39(7)   | 10(4)  | -6(4)    | -9(4)  |

---

Table 5. Hydrogen coordinates ( $\times 10^4$ ) and isotropic displacement parameters ( $\text{\AA}^2 \times 10^{-3}$ ) for wong188.

|        | x     | y    | z    | U(eq) |
|--------|-------|------|------|-------|
| H(1A)  | 300   | 6002 | 7766 | 46    |
| H(1B)  | 604   | 6928 | 7182 | 46    |
| H(2A)  | 2074  | 6218 | 6232 | 39    |
| H(2B)  | 432   | 5940 | 6363 | 39    |
| H(3A)  | 963   | 4659 | 7284 | 39    |
| H(3B)  | 1589  | 4673 | 6350 | 39    |
| H(5A)  | 5345  | 3679 | 7344 | 38    |
| H(5B)  | 4378  | 3058 | 8081 | 38    |
| H(6A)  | 3277  | 3532 | 6889 | 30    |
| H(6B)  | 2355  | 3646 | 7737 | 30    |
| H(6C)  | 6714  | 3998 | 8425 | 40    |
| H(6D)  | 6267  | 4913 | 8685 | 40    |
| H(7A)  | 7987  | 4961 | 7433 | 42    |
| H(7B)  | 6674  | 4734 | 7018 | 42    |
| H(8A)  | 6765  | 6266 | 7729 | 37    |
| H(8B)  | 7331  | 6272 | 6788 | 37    |
| H(9A)  | 5327  | 7484 | 6704 | 37    |
| H(9B)  | 5070  | 7196 | 7672 | 37    |
| H(10A) | 2978  | 7775 | 7348 | 40    |
| H(10B) | 2996  | 7233 | 6624 | 40    |
| H(11A) | 5863  | 6015 | 5912 | 37    |
| H(11B) | 4322  | 6424 | 6038 | 37    |
| H(12A) | 3866  | 5066 | 5826 | 37    |
| H(12B) | 5019  | 4635 | 6354 | 37    |
| H(13A) | 955   | 6372 | 8809 | 41    |
| H(13B) | 1509  | 7359 | 8463 | 41    |
| H(14A) | 4402  | 4336 | 9515 | 33    |
| H(14B) | 4505  | 3365 | 9320 | 33    |
| H(15A) | 217   | 2276 | 7408 | 127   |
| H(15B) | -605  | 2630 | 8185 | 127   |
| H(16A) | -2802 | 2147 | 7946 | 107   |
| H(16B) | -2024 | 2683 | 7094 | 107   |
| H(17A) | -161  | 1817 | 6470 | 90    |
| H(17B) | -1329 | 1644 | 5931 | 90    |

|        |       |       |      |    |
|--------|-------|-------|------|----|
| H(18A) | -885  | 208   | 6047 | 66 |
| H(18B) | 657   | 658   | 5922 | 66 |
| H(19A) | 15    | -1271 | 7584 | 44 |
| H(19B) | 204   | -1131 | 6613 | 44 |
| H(20A) | -2166 | -897  | 6600 | 44 |
| H(20B) | -2121 | -1720 | 7306 | 44 |
| H(21A) | -4833 | -167  | 7820 | 32 |
| H(21B) | -4528 | -822  | 7185 | 32 |
| H(22A) | -3108 | 312   | 6266 | 32 |
| H(22B) | -4751 | 536   | 6434 | 32 |
| H(23A) | -4184 | 1372  | 7414 | 50 |
| H(23B) | -3607 | 1777  | 6488 | 50 |
| H(24A) | 1660  | 1563  | 8424 | 67 |
| H(24B) | 1276  | 543   | 8657 | 67 |
| H(25A) | 2883  | 1009  | 7425 | 64 |
| H(25B) | 1558  | 1432  | 7042 | 64 |
| H(26A) | 2175  | 6     | 6745 | 53 |
| H(26B) | 1646  | -381  | 7681 | 53 |
| H(28A) | -3616 | -1779 | 8416 | 39 |
| H(28B) | -4108 | -945  | 8821 | 39 |

---

X-ray Crystallographic Software Employed:

APEX2 Version 2.2 /SHELXTL (Bruker AXS Inc., 2007)

SAINT Version 7.34a (Bruker AXS Inc., 2007)

SADABS Version 2007/2 (Sheldrick, Bruker AXS Inc.)

XPREP Version 2005/2 (Sheldrick, Bruker AXS Inc.)

Bruker suite of programs APEX2/SHELXTL, SAINT, SADABS, XPREP may be obtained from Bruker AXS.Inx, 5467 East Cheryl Parkway, Madison WI 53711

XS Version 2008/1 (George M. Sheldrick, Acta Cryst. (2008) **A64**, 112-122.)

XL Version 2008/1 (George M. Sheldrick, Acta Cryst. (2008) **A64**, 112-122.)

X-ray crystal structure figures were prepared using CrystalMaker 8.2 for Mac (CrystalMaker Software Ltd., Centre for Innovation & Enterprise, Oxford University Begbroke Science Park, Sandy Lane, Yarnton, Oxfordshire, OX5 1PF, UK; <http://www.crystallmaker.com>)

Biodistribution of  $^{64}\text{Cu}$ -2:

**Biodistribution of  $^{64}\text{Cu}$ -CB-TE2P in 33 male Lewis rats; 1, 2, 4, & 24 hr (%ID/gram)**

|                 | 1<br>Hr. |            | 2<br>Hr. |            | 4<br>Hr. |            | 24<br>Hr. |            |
|-----------------|----------|------------|----------|------------|----------|------------|-----------|------------|
| <i>blood</i>    | 0.1515   | +/- 0.0247 | 0.0208   | +/- 0.0046 | 0.0030   | +/- 0.0005 | 0.0019    | +/- 0.0004 |
| <i>lung</i>     | 0.1274   | +/- 0.0336 | 0.0379   | +/- 0.0045 | 0.0408   | +/- 0.0269 | 0.0126    | +/- 0.0024 |
| <i>liver</i>    | 0.0929   | +/- 0.0062 | 0.0741   | +/- 0.0093 | 0.0594   | +/- 0.0057 | 0.0274    | +/- 0.0015 |
| <i>spleen</i>   | 0.0474   | +/- 0.0096 | 0.0243   | +/- 0.0024 | 0.0222   | +/- 0.0038 | 0.0172    | +/- 0.0010 |
| <i>kidney</i>   | 1.1894   | +/- 0.3496 | 0.4912   | +/- 0.0713 | 0.4285   | +/- 0.0306 | 0.3568    | +/- 0.0517 |
| <i>muscle</i>   | 0.0600   | +/- 0.0092 | 0.0151   | +/- 0.0029 | 0.0085   | +/- 0.0021 | 0.0068    | +/- 0.0012 |
| <i>fat</i>      | 0.0578   | +/- 0.0118 | 0.0158   | +/- 0.0033 | 0.0060   | +/- 0.0041 | 0.0003    | +/- 0.0032 |
| <i>heart</i>    | 0.0731   | +/- 0.0204 | 0.0172   | +/- 0.0071 | 0.0144   | +/- 0.0062 | 0.0080    | +/- 0.0006 |
| <i>bone</i>     | 0.6862   | +/- 0.1429 | 0.3087   | +/- 0.0296 | 0.1676   | +/- 0.0131 | 0.1186    | +/- 0.0159 |
| <i>marrow</i>   | 0.1199   | +/- 0.0205 | 0.0643   | +/- 0.0099 | 0.0290   | +/- 0.0107 | 0.0120    | +/- 0.0149 |
| <i>stomach</i>  | 0.0825   | +/- 0.0316 | 0.0389   | +/- 0.0135 | 0.0464   | +/- 0.0202 | 0.0262    | +/- 0.0312 |
| <i>sm int</i>   | 0.1064   | +/- 0.0619 | 0.0472   | +/- 0.0189 | 0.0289   | +/- 0.0066 | 0.0135    | +/- 0.0043 |
| <i>u lg int</i> | 0.2452   | +/- 0.0540 | 0.1562   | +/- 0.0513 | 0.2507   | +/- 0.0873 | 0.0354    | +/- 0.0175 |
| <i>l lg int</i> | 0.0285   | +/- 0.0029 | 0.0562   | +/- 0.0400 | 0.1448   | +/- 0.0480 | 0.1736    | +/- 0.0453 |
| <i>tail</i>     | 0.4413   | +/- 0.3154 | 0.1852   | +/- 0.1090 | 0.2824   | +/- 0.3877 | 0.0932    | +/- 0.0386 |
